1     Insights into the regulatory mechanisms of *Clostridioides difficile*  
2                                     biofilm formation

3     Anthony M. Buckley<sup>1</sup>, Duncan Ewin<sup>1</sup>, Ines B. Moura<sup>1</sup>, Mark H. Wilcox<sup>1</sup> & Gillian R.  
4     Douce<sup>2\*</sup>

5     <sup>1</sup>Healthcare Associated Infection Research Group, Molecular Gastroenterology, Institute for  
6     Medical Research, University of Leeds, Leeds. U.K. LS1 3EX

7     <sup>2</sup>Institute of Infection, Immunity and Inflammation, University of Glasgow, Glasgow, U.K.  
8     G12 8TA

9     \*Corresponding author: Dr Gillian Douce, Email: [Gillian.Douce@glasgow.ac.uk](mailto:Gillian.Douce@glasgow.ac.uk), Tel:  
10    +44141 3302842, Institute of Infection, Immunity and Inflammation, University of  
11    Glasgow, Glasgow, U.K. G12 8TA

12    Running title: *C. difficile* biofilm formation

13    Key words: *Clostridium difficile*, biofilm, metabolism, small RNAs

14

1 Abstract

2 Mucosal biofilms play an important role in intestinal health; however, the mucosal bacterial  
3 community has been implicated in persistent infections. *Clostridioides difficile* is an  
4 important nosocomial pathogen, with an unacceptable high rate of recurrence following  
5 antibiotic treatment. As *C. difficile* is a known biofilm producer, a property which may  
6 contribute to this suboptimal therapeutic response, we have investigated the transcriptional  
7 changes and regulatory pathways during the transition from planktonic to biofilm mode of  
8 growth. Widespread metabolic reprogramming during biofilm formation was detected,  
9 characterised by an increased usage of glycine metabolic pathways to yield key metabolites,  
10 which are used for energy production and synthesis of short chain fatty acids. We detected  
11 the expression of 107 small non-coding RNAs that appear to, in some part, regulate these  
12 pathways; however, 25 of these small RNAs were specifically expressed during biofilm  
13 formation, indicating they may play a role in regulating biofilm-specific genes. Similar to  
14 *Bacillus subtilis*, biofilm formation is a multi-regulatory process and SinR negatively  
15 regulates biofilm formation independently of other known mechanisms. This comprehensive  
16 analysis furthers our understanding of biofilm formation in *C. difficile*, identifies potential  
17 targets for anti-virulence factors, and provides evidence of the link between metabolism and  
18 virulence traits.

19

## 1 INTRODUCTION

2 *Clostridium difficile* is the most common infective cause of antibiotic associated diarrhoea,  
3 causing a huge burden on health care facilities around the world. *C. difficile* infection (CDI)  
4 can manifest as mild, self-limiting diarrhoea to pseudomembranous colitis, colonic  
5 perforation and death. The majority of symptoms are due to the production of two large  
6 toxins, TcdA and TcdB<sup>1</sup>, the actions of which cause the loss of epithelial barrier integrity<sup>2</sup>.  
7 The proportion of CDI cases that recur after primary antibiotic therapy is 20-30%<sup>3</sup>, with most  
8 representing relapses due to the original strain. This suggests that *C. difficile* can occupy a  
9 protective niche, which can play a role in long-term persistence/colonisation *in vivo*. Indeed,  
10 we have recently shown that sessile *C. difficile* cells contribute towards recurrent disease<sup>4</sup>.

11 The term ‘biofilm’ describes microbial populations enclosed in a self-produced matrix  
12 adherent to each other and/or surfaces. Biofilms are ubiquitous in nature and can have  
13 substantial benefits/consequences depending on the environment and composition of the  
14 biofilm. Within the human gastrointestinal tract (GI tract), there is growing evidence that the  
15 microbiota can exist in two forms: luminal planktonic bacteria and mucosal sessile bacteria<sup>5</sup>,  
16 where the formation of biofilms can affect the function of the intestinal microbiome and its  
17 interactions with the host<sup>6</sup>. In healthy individuals, the microbiota exists in a mutualistic state  
18 with the host, i.e. the host can use bacterial fermentation products of food as an energy  
19 source, and bacteria are provided with favourable conditions for growth. Perturbation of this  
20 mutualistic relationship, e.g. following administration of antibiotics, causes profound effects  
21 on the status quo of the epithelial layer, the metabolic functions of the gut<sup>7</sup> and eliminates the  
22 protective colonisation barrier that allows colonisation or outgrowth of potentially pathogenic  
23 bacteria, such as *C. difficile*<sup>8</sup>.

1 *C. difficile* can form a mono-species biofilm<sup>9</sup> or associate with an existing poly-species  
2 biofilm *in vitro* and *in vivo*<sup>4,10,11</sup>. Strong evidence exists to suggest that sessile *C. difficile*  
3 biofilms exist as a heterologous population, made up of vegetative cells, spores and micro-  
4 aggregates, all encased in a glycan-rich extracellular matrix, composed mostly of  
5 polysaccharide PS-II<sup>12,13</sup>. Poquet *et al.*,<sup>14</sup> characterised the genetic pathways present in strain  
6 630 $\Delta$ *erm* during mid-stage biofilm development (72 hr growth); sessile cells were found to  
7 have a different metabolic profile, remodelled cell wall and envelope and display different  
8 cell surface organelles compared with planktonic cells.

9 The genetic factors that control the switch of planktonic motile *C. difficile* cells to sessile  
10 non-motile cells are largely unknown; however, several cell-surface structures, such as Type  
11 IV pili (T4P)<sup>15,16</sup>, flagella<sup>17,18</sup> and S-layer<sup>12,19</sup> have been shown to play a role in biofilm  
12 formation (reviewed in<sup>20</sup>). Some of these cell surface macromolecules can be genetically  
13 controlled by riboswitches in response to the secondary cell messenger Bis-(3'-5')-cyclic  
14 dimeric guanosine monophosphate (c-di-GMP). High c-di-GMP levels increase the  
15 expression of the T4P loci<sup>21</sup>, by interacting with a type II riboswitch (Cdi2\_4)<sup>22</sup>, whilst  
16 repressing the expression of the major flagella operon *flgB*<sup>23</sup> via a type I riboswitch  
17 (Cdi1\_3)<sup>22,24</sup>. In this way, a single signalling molecule can help coordinate cell lifestyle  
18 differentiation within a population.

19 In *Bacillus subtilis*, there are several genetic pathways that promote biofilm formation, one  
20 through post-transcriptional phosphorylation of Spo0A, which in turn regulates the SinI-SinR  
21 locus, allowing activation of matrix production genes (reviewed in<sup>25</sup>). SinR represses the  
22 genetic loci needed for biofilm formation, but *sinI* expression overcomes this repression,  
23 leading to biofilm formation. *C. difficile* genomes contain a two gene locus similar to the  
24 genetic arrangement in *B. subtilis*, corresponding to a homologue of SinR (CD2214 in 630  
25 and CDR20291\_2121 in R20291). Another gene at this locus, CDR20291\_2122, has been

1 reported; however, there is a discrepancy in the literature whether this second gene is a  
2 homologue of SinI or if this is an extra SinR homologue (termed SinR')<sup>26-28</sup>. *C. difficile* SinR  
3 and SinR' are master regulators that play a role in regulating biofilm formation, motility,  
4 sporulation and toxin production<sup>14,27,28</sup>. Inhibition of flagella rotation is another genetic  
5 pathway that promotes biofilm formation in *B. subtilis*, through phosphorylation of the  
6 pleiotropic regulator, DegU<sup>29</sup>. A similar phenotype has been seen in *C. difficile*, where  
7 inhibition of flagella rotation, either through deletion of flagella motor (*motB*) or preventing  
8 flagella glycosylation, resulted in increased biofilm formation<sup>17,30</sup>, although the underlying  
9 mechanisms for this are unclear.

10 In our study, we define the genetic pathways during early stages of biofilm development in  
11 the clinical *C. difficile* ribotype 027 strain R20291. Through defined chromosomal mutations,  
12 we explore the role of CDR20291\_2121 during biofilm formation, and the interplay of  
13 different regulatory pathways involved biofilm formation.

14

## 1 MATERIALS AND METHODS

### 2 *Bacterial strains and growth conditions*

3 Bacterial strains used in this study are listed in **Supplemental Table S1**. *Escherichia coli*  
4 TOP10 (Invitrogen, U.K.), used as a cloning host and *E. coli* CA434<sup>31</sup> as a conjugal donor  
5 were grown aerobically on Luria Bertani medium supplemented with ampicillin (100 µg/ml<sup>-1</sup>)  
6 or chloramphenicol (15 µg/ml<sup>-1</sup>) when required. *C. difficile* strains were routinely grown on  
7 either CCEY agar plates supplemented with cefoxitin-cycloserine and 5% horse blood or  
8 Brain-heart infusion (BHI) agar in an anaerobic workstation (Don Whitley Scientific Ltd,  
9 U.K.) at 37 °C. Brain-heart infusion (BHI) broth supplemented with yeast extract and  
10 cycteine was routinely used to grow *C. difficile* strains. Plasmids used in this study are shown  
11 in **Supplemental Table S1 and Figure S1**.

### 12 *Biofilm growth assay*

13 Sterilised 13 mm glass cover slips were placed at the bottom of the well of a 24-well tray.  
14 Quadruple 2 ml liquid BHISC cultures were pre-reduced and inoculated (1:10) with overnight  
15 cultures of *C. difficile* strains and incubated anaerobically for 3 days. The glass cover slips  
16 were thrice washed with PBS and 1 % filter sterilised crystal violet (CV) used to visualise the  
17 biofilms. Excess CV was removed by thrice washing the glass cover slip with PBS and using  
18 100 % methanol to dissolve the remaining CV. 1:10 serial dilutions of these cultures were  
19 made in PBS and the OD<sub>595</sub> measured in a Tecan spectrophotometer (Infinite Pro 200,  
20 Tecan). A media only negative control was included in all experiments and used to adjust the  
21 background CV absorbance. All assays were performed with a minimum of three biological  
22 repeats and four technical repeats. A student's T test was performed to determine if there  
23 were differences in biofilm formation between mutant strains and wild-type. To enumerate  
24 the total viable counts and the spore cells, 3-day-old biofilms were washed with pre-reduced

1 PBS and mechanically disrupted before 1:10 serial dilutions were made and plated onto  
2 CCEY. Spores were enumerated by ethanol shock method before 1:10 serial dilutions made  
3 and plated onto CCEY as before.

#### 4 *Scanning electron microscopy*

5 Biofilm cultures were grown as previously described but for 12 hr, except Thermanox®  
6 coverslips were used instead of glass coverslips. Biofilms were fixed and prepared as  
7 described by Goulding *et al.*,<sup>32</sup>.

#### 8 *Cytotoxin assay*

9 Supernatant from planktonic grown cultures was centrifuged (14,000 rpm, 10 min, 4°C) and  
10 filter sterilised by filtration through 0.22 µM syringe filters. Biofilm cultures were grown  
11 washed as above, and then 500 µl sterile PBS added and the biofilm mechanically disrupted.  
12 10-fold serial dilutions of planktonic and biofilm supernatants were applied to culture Vero  
13 cells and cytotoxicity levels determined as previously described<sup>10</sup>. Cytotoxin titers were  
14 correlated to an arbitrary log<sub>10</sub> scale and expressed as relative units (RUs) at the highest  
15 dilution, with approximately 70% cell rounding (i.e., 100, 1RU; 10<sup>-1</sup>,  
16 2RUs; and 10<sup>-2</sup>, 3RUs).

#### 17 *RNA extraction, DNase treatment and rRNA removal*

18 Biofilms used for RNA-Seq experiments were grown as described above except, 6-well trays  
19 with 5 ml BHISC without glass cover slips were used. Cultures were grown for 12 hr  
20 anaerobically before the supernatant removed and replaced with pre-reduced RNA<sup>later</sup>  
21 (ThermoFisher Scientific) to wash the biofilm and incubated in a further aliquot of RNA<sup>later</sup>  
22 for 30 mins and mechanically disrupted. The wells from each tray were pooled and  
23 centrifuged at 4,000 rpm for 30 mins at 4 °C and the pellets frozen at -20 °C until extracted.

1 Alongside each biofilm culture, 10 ml from a shaking culture, grown for 12 hr, was treated  
2 with RNA*later* and processed in the same way. Three biological replicates were performed  
3 for both culture types.

4 RNA was extracted using the FastRNA® Pro Blue Kit (MP Biosciences) and the FastPrep®  
5 24 system following the manufacturer's instructions. Genomic DNA was removed from the  
6 RNA samples using Turbo DNA-free™ kit (ThermoFisher Scientific) following the  
7 manufacturer's rigorous treatment protocol. RNA integrity and quantity were checked using  
8 the Agilent 2100 bioanalyzer, then rRNA depleted using the Ribo-Zero™ rRNA removal for  
9 Gram-positive bacteria (Illumina) following the manufacturer's instructions. Elute RNA was  
10 purified by phenol/chloroform extraction and ethanol precipitation and the pellet resuspended  
11 in RNase, DNase free water.

#### 12 *cDNA preparation and sequencing*

13 cDNA library construction for Ion Torrent sequencing was performed using the Ion Total  
14 RNA-Seq Kit, following the manufacturer's instructions and sequences generated via Ion  
15 Torrent sequencing. cDNA preparation and sequencing services were provided by the  
16 Glasgow Polyomics suite, University of Glasgow.

#### 17 *Sequencing data analysis*

18 After sequencing, adapters were trimmed by Ion Torrent internal software during the base  
19 calling. CLC genomics workbench version 12.0 (Qiagen) was used for quality, alignment  
20 with the *C. difficile* R20291 genome (GenBank Accession Number: FN545816.1),  
21 normalisation of the reads per kilobase per million mapped reads and for the analysis of  
22 differential gene expression, using default settings for each analysis. A gene was considered  
23 to be differentially expressed [DE (genes G)] when the false discovery rate (FDR) *p* value  
24 was  $\leq 0.05$  and/or a  $-2 \leq \text{fold change} \leq 2$  in comparison with shaking cultures was observed.



1 DEGs were filtered to remove lowly expressed genes (less than 10 reads). Functional and  
2 metabolic pathways were inferred using a variety of means; homology to previously  
3 characterised *C. difficile* strain 630 proteins, Gene Ontology terms (UniProt for R20291  
4 protein database)<sup>33</sup>, Blastp homology searches (restricted to all *C. difficile* strains) and the  
5 Kyoto Encyclopaedia of Genes and Genomes (KEGG) database. sRNAs were identified by  
6 aligning the sequencing read map from each replicate with the R20291 gene track and  
7 searching for reads mapped outside of the coding regions. Rfam database was used to predict  
8 RNA secondary structure and assign putative Rfam family to that sRNA<sup>34</sup> RNAfold version  
9 2.4.8<sup>35</sup> was used to predict the secondary structure of the glycine riboswitches, and structures  
10 were viewed using Force-directed RNA (forna) webviewer<sup>36</sup>. RNAPredator version 2.4.8<sup>37</sup>  
11 was used to predict the mRNA targets of the novel sRNAs.

#### 12 *RT-PCR confirmation of transcripts*

13 RT-PCR was used to confirm putative sRNA expression detected by RNASeq within  
14 biofilms and shaking cultures. RT-PCR was performed using three independent biological  
15 repeats of those samples used for Ion Torrent sequencing. Briefly, RNA was extracted,  
16 treated with DNase, rRNA depleted and quality controlled as described above. After rRNA  
17 depletion, one shaking replicate failed the QC parameters and was discounted from further  
18 processing and analysis. cDNA was constructed using SuperScript® First-strand cDNA  
19 synthesis system (ThermoFisher Scientific) following manufacturer's instructions. cDNA  
20 across the samples was normalised and specific transcripts amplified using Phusion® high-  
21 fidelity PCR master mix (NEB) with primers outlined in **Supplemental Table S2**. Products  
22 were visualised by agarose gel electrophoresis.

#### 23 *C. difficile R20291 mutant construction*

1 Defined chromosomal CDR20291\_2121 mutants, either in wild-type or R20291::Tn0241  
2 backgrounds, were constructed using the method described in<sup>38</sup>. Briefly, approximately 1200  
3 bp up- and downstream of CDR\_2121 start and stop codons (**Supplemental Figure S1A**),  
4 homology arms 1 & 2, respectively, were amplified using primers outlined in **Supplemental**  
5 **Table S2** and Phusion® high-fidelity PCR master mix with GC buffer. The insert was cloned  
6 into the allelic exchange vector pMTL82151 using Gibson Assembly® master mix  
7 (**Supplemental Table S2**) and transformed into *E. coli* Topo10 cells (**Supplemental Figure**  
8 **S1B**). Once confirmed, the plasmid was transformed into *E. coli* CA434 cells and conjugated  
9 with *C. difficile* R20291 as previously described<sup>38</sup>. *C. difficile*  $\Delta$ CDR20291\_2121 strains  
10 were confirmed by PCR and sequencing (**Supplemental figure S1C**). Using this method,  
11 321/339 bp of CDR20291\_2121 were deleted leaving the start and stop codons intact, thus  
12 preventing polar effects of downstream genes.

### 13 *Construction of complementation vectors*

14 The CDR20291\_2121 complementation plasmid was constructed by PCR amplification from  
15 20 bp upstream of the CDR20291\_2121 start codon to the stop codon, the fragment cloned  
16 into the constitutive expression vector pRPF144<sup>39</sup>, and transformation of *E. coli* Topo10 cells  
17 (**Supplemental Figure S2**). Plasmids were sequenced and transformed into *E. coli* CA434  
18 cells for conjugation to *C. difficile* strains.

### 19 *Statistical analysis*

20 A student's T test in Excel (Microsoft office) was used to determine the significant  
21 differences in biofilm formation from the R20291 wild-type strain, mutated strains and  
22 complemented strains.

23

## 1 RESULTS

### 2 *Characterising the C. difficile strain R20291 biofilm*

3 The ability of *C. difficile* to form a biofilm *in vitro* has been shown previously<sup>12,13</sup>; however,  
4 in this study we grew R20291 biofilms, which are more pronounced compared with other  
5 strains<sup>12</sup>. Biofilms were grown on glass coverslips to reduce disruption that occurs during the  
6 washing steps. After 3 days, *C. difficile* R20291 was able to form a mature biofilm that was  
7 encased in a self-produced extracellular matrix (**Figure 1**). This biofilm was composed of  
8 vegetative and spore cells (5:1 ratio, respectively); however, scanning electron microscopy  
9 (SEM) analysis detected what appeared to be cellular debris within the biofilms as well. It is  
10 unclear whether the cellular debris seen was due to natural cell death (possibly associated  
11 with nutrient limitation) or due to programmed cell death. A cannibalism phenotype has been  
12 described during *B. subtilis* biofilm formation, whereby a proportion of cells secrete a toxin  
13 that causes cell death unless that cell is expressing the anti-toxin<sup>40</sup>. *C. difficile* harbours  
14 several of these Toxin-Antitoxin (TA) systems that have a putative role in biofilm  
15 formation<sup>41,42</sup>. The observation of spores within the biofilm, as seen previously<sup>43</sup>, alongside  
16 vegetative cells suggests a heterogenous population whereby cells undergo cell differentiation  
17 to perform different functions within a biofilm.

18 This contrasts with the immature biofilm that forms after 12 hr growth (**Figure 1**); vegetative  
19 cells are the dominate cell type in immature biofilms (vegetative cell and spore ratio of 700:1,  
20 respectively). This lack of spores within the biofilm, was reflected in the expression patterns  
21 of the early and late-stage sporulation genes. A number of early stage sporulation genes  
22 (*spo0A*, *soj*, *spoIIAA* and *spoIIAB*) are upregulated between 1.8 and 3.9-fold in biofilm cells,  
23 whilst the late stage genes (*spoIVB*, *spoIIIF*, *spoVG* and *obg*) were down regulated (between -  
24 2.2 and -4.0-fold) compared with stationary phase cells<sup>44</sup> (**Supplemental Table 3**). *C.*

1 *difficile* sporulation and biofilm regulatory pathways intersect with Spo0A playing an  
2 important role in both pathways<sup>45</sup>, similar to biofilm formation in *B. subtilis*<sup>25</sup>. Spo0A is  
3 phosphorylated by orphan histidine kinases (KinA-D), thus low levels of Spo0A-P initiate  
4 biofilm formation whilst high levels initiate sporulation. CDR20291\_1194 is an orphan  
5 histidine kinase with homology to the Kin proteins<sup>44</sup> and was upregulated (2.2-fold) in  
6 biofilm cells; however, the potential interaction between Spo0A and CDR20291\_1194 and  
7 the role in biofilm formation needs further investigation. In *B. subtilis*, Soj inhibits expression  
8 of Spo0A-P activated sporulation genes<sup>46,47</sup>, so it is interesting that during *C. difficile* biofilm  
9 formation, both *soj* and *spo0A* are upregulated, suggesting there could be a fine-tuning  
10 mechanism for biofilm initiation versus sporulation. Poquet *et al.*<sup>14</sup> observed the induction of  
11 the late-stage sporulation cascade during biofilm maturation. During initial biofilm  
12 development, although cell aggregation was observed, there was a lack of self-produced  
13 matrix surrounding the cells and cells appeared intact, no cell debris, at this time.

14 Current evidence suggests that toxin production is increased within *in vitro* and *in vivo*  
15 formed biofilms<sup>10,11,48,49</sup>. In our experiments, both *tcdA* and *tcdB* were upregulated, 1.9- and  
16 2.4-fold respectively, in biofilm cells (**Supplemental Table 3**). The remaining members  
17 within the PaLoc were also found to be upregulated in biofilm cells; however, significance  
18 was below our threshold (data not shown). Although highly expressed under both conditions,  
19 the CDT loci was not differentially expressed between biofilm and stationary phase cells  
20 (data not shown). Incorporation of *C. difficile* cells into mucosal biofilms would place these  
21 toxin producing cells adjacent to the host membrane, where small increases in toxin  
22 production could have an effect.

23 *Contribution of the putative biofilm regulator, CDR20291\_2121 (sinR homologue), to biofilm*  
24 *formation*

1 The *C. difficile* putative *sinR* homologue, CDR20291\_2121, has previously been shown to  
2 interact with *sigD* (toxin production) and *spo0A* (sporulation) to control these pathways and  
3 the *sin* loci can modulate biofilm formation<sup>14,28</sup>. Transcriptome analysis of this locus showed  
4 decreased expression (-3.3-fold) of CDR20291\_2121 in biofilm cultures compared with  
5 stationary phase cultures, although only low levels of expression were seen (**Figure 2**). This  
6 could explain the decreased levels of spores and increased toxin expression in biofilm  
7 samples. We sought to identify the specific role of CDR20291\_2121, as an inhibitor of  
8 biofilm formation, by precision genome deletion. To prevent polar effects on downstream  
9 genes, we deleted 321/339 bp of CDR20291\_2121, leaving the start and stop codons intact  
10 (**Figure 2 & Supplemental Figure 1**). Deletion of CDR20291\_2121 significantly increased  
11 *C. difficile* biofilm formation compared to wild-type ( $p > 0.001$ ), and plasmid  
12 complementation restored biofilm formation back to near wild-type levels. (**Figure 2**). SEM  
13 analysis of these biofilms, shows an increase in the amount of extracellular matrix, compared  
14 with WT (**Figure 1 and 2d**). Interestingly, plasmid-based over-expression of  
15 CDR20291\_2121 in a wild-type background significantly reduced biofilm formation ( $p >$   
16  $0.001$ ), giving further evidence of the role of this gene in biofilm formation.

17 The regulatory pathways that lead to biofilm formation in *B. subtilis* are multifactorial,  
18 whereby inhibition of flagella rotation represents a distinct entry mechanism (from de-  
19 repression of SinR) into biofilm formation<sup>29</sup>. Previously, we showed that prevention of  
20 flagella rotation, but not the complete absence of flagella, could lead to increased biofilm  
21 formation in *C. difficile*<sup>17,18</sup>. Deletion of CDR20291\_2121 in this non-motile, flagella positive  
22 strain (CDR20291\_0241::Tn) further enhanced biofilm formation, in a cumulative manner to  
23 produce a significantly greater biofilm than each individual mutation (**Figure 2**). Plasmid  
24 complementation restored biofilm formation similar to CDR20291\_0241::Tn background  
25 strain. SEM images suggest this is due to further extracellular matrix production in this

1 double mutant compared with the single  $\Delta 2121$  mutant or wild-type (**Figure 1 and 2e**). These  
2 results show that, similar to *B. subtilis*, biofilm formation in *C. difficile* is a multifactorial  
3 process, whereby several environmental cues are needed for full biofilm formation.

#### 4 *Changes to the metabolic landscape during initial biofilm formation*

5 The entry into biofilm formation was associated with expressional changes to the metabolic  
6 pathways, compared with stationary phase cultures. Principal component analysis of our  
7 transcriptomic biofilm and stationary phase sequencing data showed variation between the  
8 biofilm and stationary phase culture data, suggesting that there were significant changes  
9 between these sample types (**Supplemental Figure S4**). From our expression data, 434 genes  
10 were differentially expressed between biofilm and stationary phase cultures; 205 genes were  
11 upregulated in biofilm cultures and 229 genes upregulated in stationary phase cultures  
12 (**Supplemental Table 3**). This number of differentially expressed genes (DEGs) between  
13 biofilm and stationary phase cultures is not surprising given that both culture conditions were  
14 grown in the same media for the same length of time and is similar to those reported in other  
15 studies<sup>50</sup>.

#### 16 Production of central metabolites

17 In comparison to stationary phase cultures, the metabolic landscape during the initial steps of  
18 biofilm formation is predominated by the upregulation of fermentation pathways that result in  
19 the production of central metabolites namely, acetyl-CoA, pyruvate and oxaloacetate. These  
20 core metabolites are used in a variety of metabolic pathways, such as the production of short  
21 chain fatty acids. During the early stages of biofilm formation, the metabolism of glycine was  
22 the predominant pathway for production of these central metabolites through three distinct  
23 pathways. Intracellular glycine can be converted to serine and then to pyruvate via the gene  
24 products of *glyA* and *tdcB*, which were upregulated, 2.1 and 2.6-fold respectively, in biofilm

1 samples compared with stationary phase cultures (**Figure 3 & Supplemental Table 3**).

2 Alongside this, glycine can be degraded to glyoxylate, which can enter the glyoxylate cycle,

3 producing the central metabolite oxaloacetate; several putative genes encoding glyoxylate

4 metabolising proteins were upregulated (2.1 – 3-fold) during biofilm formation

5 (**Supplemental Table 3**). Like the citrate cycle, the glyoxylate cycle synthesises carbon-

6 based macromolecules but from two-carbon sources instead, such as ethanol and acetate, thus

7 bypassing the decarboxylation steps in the citrate cycle<sup>51</sup>. This glyoxylate shunt is important

8 for the metabolic adaption of many pathogens during host-pathogen interactions<sup>51,52</sup> and

9 could be utilised by *C. difficile* during biofilm formation in the intestinal tract. Another route

10 of glycine metabolism during biofilm growth utilises the combination of the glycine cleavage

11 system (*gcvPBH*, upregulated 2.5 – 2.6-fold) and the wood-Ljungdahl pathway (*hydN1*, *fdhF*,

12 *fhs*, *fchA*, CDR20291\_0648-0655; upregulated 2.1 – 3.1-fold). The glycine cleavage system

13 produces the intermediate 5, 10-methylenetetrahydrofolate, which is utilised by the Wood-

14 Ljungdahl pathway to produce acetyl-CoA<sup>53</sup>. Glycine catabolism in this way appears to be

15 important for biofilm formation, indeed mutational analysis of *gcv* loci in *B. subtilis*

16 abolished biofilm formation in the presence of exogenous glycine<sup>54</sup>.

17 Interestingly, we detected the presence of a glycine riboswitch upstream of the

18 CDR20291\_1555-*gcvPB* operon (**Figure 4**). Glycine riboswitches respond to intracellular

19 glycine levels and frequently occur upstream of, and control the expression of, *gcvTPB*

20 operons in other bacteria. When glycine is bound, the riboswitch induces expression, causing

21 the degradation of glycine<sup>54,55</sup>. The presence of CDR20291\_CDs019 upstream of

22 CDR20291\_1555-*gcvPB* operon corresponded with increased expression of this operon in

23 biofilm samples compared with shaking samples (**Figure 4**), suggesting intracellular

24 accumulation of glycine during biofilm growth can occur. Structural predictions of this short

25 glycine riboswitch showed homology to the Type I – singlet consensus structure with a ghost

1 aptamer (antiterminator) structure at the 3' end of the RNA (**Figure 4E**)<sup>56</sup>. High glycine  
2 levels correlated with a metabolic shift towards glycine metabolism in biofilm cells. In  
3 *Bacillus subtilis*, mutational analysis of this glycine riboswitch negatively affected swarming  
4 motility and biofilm formation in the presence of exogenous glycine<sup>54</sup>. A second glycine  
5 riboswitch was identified; CDR20291\_CDs028 is found upstream of CDR20291\_2174, a  
6 putative sodium:alanine symporter family, which was not expressed in either biofilm or  
7 shaking samples. Similarly, Khani *et al.*,<sup>57</sup> identified a glycine riboswitch upstream of a  
8 sodium:alanine symporter family gene in *Streptococcus pyogenes*, which repressed this gene  
9 during high intracellular glycine levels. The size and predicted shape of this glycine  
10 riboswitch is characteristic of the two-tandem glycine-binding aptamers, followed by a single  
11 expression platform (**Figure 4F**)<sup>55</sup>.

## 12 Production of short-chained fatty acids

13 The production of pyruvate, acetyl-CoA and 2-oxobutanoate could be channelled into the  
14 metabolic pathways that produce short-chain fatty acids, namely the production of butanoate  
15 and/or propanoate (**Supplemental Table 3**). The conversion of pyruvate and acetyl-CoA to  
16 butanoate utilises several gene products (*nifJ*, *thlA1*, *hbd*, *bcd2* and *crt2*) in this pathway  
17 which are upregulated (1.9 – 2.7-fold) in biofilm cells compared with stationary phase  
18 cultures (**Figure 2**). Similarly, several genes in the early stages of the propanoate metabolism  
19 pathway which converts acetyl-CoA and 2-oxobutanoate to propanoate are upregulated (*ldh*,  
20 CDR20291\_1007, *msgA*, *thlA1* and CDR20291\_0650; 2.3 – 6.0-fold), whilst those genes  
21 involved in the late stages are highly expressed but were below our threshold in these  
22 experiments (data not shown). The capacity of *C. difficile* to utilise amino acids to produce  
23 fermentation products, such as butanoate and propanoate, when grown in minimal media has  
24 been reported<sup>58</sup>. However, these fermentation products appear to decrease as the biofilm  
25 matures, potentially indicating a reallocation of carbon resources in biofilm cells<sup>14</sup>.



## 1 *Reorganisation of the cell surface in sessile cells*

2 Cells entering biofilm growth appear to reorganise their cell surface by altering the  
3 expression of cell wall proteins (cwps) and the major surface organelles, flagella and type 4  
4 pili (T4P). A number of cwps are upregulated in biofilm cells, *cwp16*, *cwp20*, *cwp28*, *cwp84*  
5 and CDR20291\_2099 & 2679 increased between 2.3 – 5.3-fold. Cwp16 is a putative N-  
6 acetylmuramoyl-L-alanine amidase and *cwp20* is a putative penicillin-binding protein, both  
7 are highly conserved across *C. difficile* strains<sup>59,60</sup>. Cwp28 has an unknown function;  
8 structurally, Cwp28 possess the characteristic cell wall binding 2 motifs but these are not  
9 present in all *C. difficile* ribotypes<sup>60</sup>. Cwp84 is a cysteine protease involved in generation of  
10 the S-layer by cleaving the SlpA precursor; Cwp84 mutations exhibit decreased biofilm  
11 formation<sup>12</sup>, potentially due to a malformed S-layer. We have previously shown that the S-  
12 layer is important for protein retention at the cell surface<sup>61</sup>, indeed eight putative membrane  
13 proteins (between 2.2 and 7.1-fold) and four putative secreted proteins (between 2.6 and 3.4-  
14 fold) were upregulated in biofilm cells, including a haemolysin homologue, *hlyD*.  
15 Interestingly, five genes encoding membrane-associated proteins were down regulated in  
16 biofilm cells; CDR20291\_0947 was down regulated by -7.2-fold compared with stationary  
17 phase cells (**Supplemental Table 3**).

18 Many genes encoding elements of the flagella system, including motor switch proteins,  
19 assembly proteins and flagella sigma factor, were inversely regulated in biofilm cells  
20 compared with stationary phase cells (*fliA*, *fliH*, *fliN*, *fliP*, *fliQ*; -1.6 to -3.3-fold) (**Figure 3**).  
21 The down regulation of the flagella operon correlates with the lack of flagella filaments on  
22 the cell surface, observed from SEM images (**Figure 1c**). Genes encoding elements of the  
23 T4P apparatus were upregulated (*pilA1*, *pilO*, *pilV*, *pilT*, *pilB*, *pilMN*; 2.4 – 5.1-fold) in  
24 biofilm cells (**Figure 3**). The switch from flagellate motile cells to non-flagellate twitching  
25 motility has been observed during *C. difficile* biofilm formation<sup>16,62</sup>.

1 The increased and decrease expression of the T4P and flagella operons, respectively, are  
2 controlled through c-di-GMP riboswitches; in our analysis, we detected the presence of five  
3 previously characterised c-di-GMP riboswitches<sup>22,24,62,63</sup> (**Table 1**). The presence of the type I  
4 riboswitch, Cdi1\_3, observed in the biofilm samples was associated with an absence of early  
5 stage flagella locus expression, giving further evidence this riboswitch acts as an ‘OFF’  
6 switch during biofilm formation<sup>22,24</sup>. Concurrently, biofilm samples had increased expression  
7 of the type II riboswitch, Cdi2\_4, which was associated with increased expression of several  
8 genes within the major pili operon. Interestingly, we detected expression of a second sRNA  
9 encoded upstream of Cdi2\_4, with an unknown function (homologous to  
10 CD630\_n01120/sCD4107) (**Supplemental Table 4**). Accumulation of intracellular c-di-  
11 GMP can initiate the early steps of *C. difficile* biofilm formation; we observed increased  
12 expression (28.2-fold) of *dccA*, which encodes a diguanylate cyclase to produce c-di-GMP<sup>21</sup>.  
13 Overexpression of *dccA* increases the intracellular concentration of c-di-GMP, which leads to  
14 decreased flagella synthesis and increased pili formation<sup>63</sup>. However, the upregulation of a  
15 putative phosphodiesterase, CDR20291\_2799 (2.8-fold), which degrades c-di-GMP, suggests  
16 this intracellular signal is finely controlled; indeed, there are approximately 31 genes encoded  
17 on the *C. difficile* genome with putative roles in controlling c-di-GMP levels<sup>21</sup>.

18

## 1 CONCLUSION

2 Here we describe the metabolic changes and regulatory aspects of a clinical *C. difficile*  
3 ribotype 027 epidemic strain during the transition from planktonic to biofilm cells. During  
4 biofilm initiation, cellular metabolic reprogramming, featuring an emphasis on glycine  
5 metabolism, was favoured to produce key central metabolites. Expression analysis shows that  
6 these metabolites are likely to be utilised for short-chain fatty acid production, butanoate and  
7 propanoate. These initial metabolic shifts are likely to undergo further changes as the biofilm  
8 matures. Indeed, Poquet *et al* (2018) reported an increase in fatty acid biosynthesis rather  
9 than fermentations in mature *C. difficile* biofilms. Secreted metabolic products could act as  
10 signals for biofilm formation, e.g. *B. subtilis* and *P. aeruginosa* respond to environmental  
11 acetic acid<sup>64</sup> or pyruvate, respectively. Many bacterial species change their metabolic  
12 landscape during biofilm formation, due to oxygen and/or nutrient limitation, to promote cell  
13 survival (or death of a sub population)<sup>65,66</sup>. Inhibition of these metabolic cues could  
14 potentially be used to dismantle biofilms to enhance antimicrobial treatment. Factors like D-  
15 amino acids and cyclic-di-AMP are known to inhibit *B. subtilis* biofilm formation<sup>67</sup>; our data  
16 could provide the basis for similar interventions in respect of *C. difficile* biofilm formation,  
17 i.e. preventing c-di-GMP accumulation by inhibiting DccA.

18 Metabolic remodelling is largely controlled at the transcriptional level through changes to  
19 transcription factors and regulatory small RNAs<sup>14,66,68</sup>. Our data provide insights in to the  
20 sRNAs highly expressed in biofilm and stationary phase cells. Using glycine riboswitches,  
21 biofilm cells can control the intracellular levels of glycine for biosynthesis and energy whilst  
22 maintaining adequate amounts of the amino acid for protein synthesis. The different glycine  
23 riboswitches identified here are responsible for either inhibition or elevated expression of  
24 downstream genes depending on intracellular glycine concentrations. This could represent  
25 two distinct classes of riboswitches, like those for c-di-GMP, where genes can be

1 differentially regulated ('ON' or 'OFF') depending on the intracellular concentration of a  
2 single signalling molecule. Some of the sRNAs could not be assigned a function based on  
3 homology. The discovery of new sRNA classes/motifs is constantly growing and those  
4 discovered in this study are likely to fall into this category. Weinberg *et al.*<sup>69</sup> used a novel  
5 bioinformatic approach to identify 224 novel classes of non-coding RNA, and further  
6 research into these new classes is likely to reveal novel aspects of biological control. In our  
7 analysis, we identified 36 novel putative sRNAs depending on growth conditions. This  
8 suggests that *C. difficile* expresses subsets of different sRNAs during different cellular  
9 processes. It remains to be determined if any more sRNAs could be detected during other cell  
10 processes, such as germination or sporulation.

11 The metabolic reprogramming and cell surface remodelling seen during biofilm formation in  
12 *C. difficile* is regulated on multiple levels. The regulatory networks governing biofilm in *C.*  
13 *difficile* are unknown; however, there are similarities with biofilm regulatory pathways in *B.*  
14 *subtilis*. Our data suggest that the SinR homologue in *C. difficile* can repress biofilm  
15 formation. We have shown that this regulatory pathway can work independently of another  
16 regulatory mechanism, i.e. inhibition of flagella rotation<sup>17</sup>. Here, we highlight two regulatory  
17 pathways that can each contribute towards biofilm formation; however, fulminant biofilm  
18 formation occurs when both pathways are activated in *C. difficile*.

19 Our study describes the cellular metabolic and structural changes that occur during biofilm  
20 initiation, which supports earlier reports describing a connection between virulence attributes  
21 and metabolism<sup>14,26,28,44,50</sup>. Entry into biofilm formation is regulated at multiple stages and  
22 uses a combination of transcriptional regulators and small non-coding RNAs to pass these  
23 check points. By understanding the mechanisms behind this, we hope to find potential  
24 interventions to dysregulate biofilm formation, possibly affecting multiple virulence  
25 pathways, given the inter-connected nature of these processes.

1 ACKNOWLEDGEMENTS

2 We acknowledge the help of M. Mullin (Integrated Microscopy, University of Glasgow) for  
3 SEM sample preparation. The authors gratefully acknowledge the support of the Wellcome  
4 Trust (grant number 086418 awarded to G.R.D) and the Rosetrees Trust (grant number M636  
5 awarded to M.H.W.).

1 REFERENCES

- 2 1. Just, I. *et al.* Glucosylation of Rho proteins by *Clostridium difficile* toxin B. *Nature*  
3 vol. 375 500–503 (1995).
- 4 2. Nusrat, A., Madara, J. L. & Parkos, C. A. *Clostridium difficile* Toxins Disrupt  
5 Epithelial Barrier Function by Altering Membrane Microdomain Localization of Tight  
6 Junction Proteins. *Infect. Immun.* **69**, 1329–1336 (2001).
- 7 3. Marsh, J.W., Arora, R., Schlackman, J.L., Shutt, K.A., Curry, S.R., Harrison, L. H.  
8 Association of Relapse of *Clostridium difficile* Disease with BI/NAP1/027. *J. Clin.*  
9 *Microbiol.* **50**, 4078–4082 (2012).
- 10 4. Normington, C. *et al.* Biofilms harbour *Clostridioides difficile*, serving as a reservoir  
11 for recurrent infection. *npj Biofilms Microbiomes* **7**, 16 (2021).
- 12 5. Motta, J.-P., Wallace, J. L., Buret, A. G., Deraison, C. & Vergnolle, N.  
13 Gastrointestinal biofilms in health and disease. *Nat. Rev. Gastroenterol. Hepatol.*  
14 (2021) doi:10.1038/s41575-020-00397-y.
- 15 6. de Vos, W. M. Microbial biofilms and the human intestinal microbiome. *npj Biofilms*  
16 *Microbiomes* **1**, 15005 (2015).
- 17 7. Guarner, F. & Malagelada, J. Gut flora in health and disease. *Lancet* **361**, 512–519  
18 (2003).
- 19 8. Wilson, K. H., Silva, J. & Fekety, F. R. Suppression of *Clostridium difficile* by  
20 Normal Hamster Cecal Flora and Prevention of Antibiotic-Associated Cecitis. *Infect.*  
21 *Immun.* **34**, 626–628 (1981).
- 22 9. Soavelomandroso, A. P. *et al.* Biofilm Structures in a Mono-Associated Mouse Model  
23 of *Clostridium difficile* Infection . *Frontiers in Microbiology* vol. 8 2086 (2017).

- 1 10. Crowther, G. S. *et al.* Comparison of planktonic and biofilm-associated communities  
2 of *Clostridium difficile* and indigenous gut microbiota in a triple-stage chemostat gut  
3 model. *J. Antimicrob. Chemother.* **69**, 2137–2147 (2014).
- 4 11. Semenyuk, E. G. *et al.* Analysis of Bacterial Communities during *Clostridium difficile*  
5 Infection in the Mouse. *Infect. Immun.* **83**, 4383–4391 (2015).
- 6 12. Dapa, T. *et al.* Multiple factors modulate biofilm formation by the anaerobic pathogen  
7 *Clostridium difficile*. *J. Bacteriol.* **195**, 545–555 (2013).
- 8 13. Pantaléon, V. *et al.* The *Clostridium difficile* protease Cwp84 Modulates both biofilm  
9 formation and cell- surface properties. *PLoS One* **10**, 1–20 (2015).
- 10 14. Poquet, I. *et al.* *Clostridium difficile* Biofilm: Remodeling metabolism and cell surface  
11 to build a sparse and heterogeneously aggregated architecture. *Front. Microbiol.* **9**, 1–  
12 20 (2018).
- 13 15. Maldarelli, G. A. *et al.* Type IV pili promote early biofilm formation by *Clostridium*  
14 *difficile*. 1–10 (2016) doi:10.1093/femspd/ftw061.
- 15 16. Purcell, E. B., Mckee, R. W., Bordeleau, E. & Burrus, V. Regulation of Type IV Pili  
16 Contributes to Surface Behaviors of Historical and Epidemic Strains of *Clostridium*  
17 *difficile*. **198**, 565–577 (2016).
- 18 17. Faulds-Pain, A. *et al.* The post-translational modification of the *Clostridium difficile*  
19 flagellin affects motility, cell surface properties and virulence. *Mol. Microbiol.* **94**,  
20 272–289 (2014).
- 21 18. Valiente, E. *et al.* Role of glycosyltransferases modifying type B flagellin of emerging  
22 hypervirulent *Clostridium difficile* lineages and their impact on motility and biofilm  
23 formation. *J. Biol. Chem.* **291**, 25450–25461 (2016).

- 1 19. de la Riva, L., Willing, S. E., Tate, E. W. & Fairweather, N. F. Roles of cysteine  
2 proteases Cwp84 and Cwp13 in biogenesis of the cell wall of *Clostridium difficile*. *J.*  
3 *Bacteriol.* **193**, 3276–3285 (2011).
- 4 20. Donelli, G., Vuotto, C., Cardines, R. & Mastrantonio, P. Biofilm-growing intestinal  
5 anaerobic bacteria. *Immunol. Med. Microbiol.* **65**, 318–325 (2012).
- 6 21. Bordeleau, E., Fortier, L. C., Malouin, F. & Burrus, V. c-di-GMP turn-over in  
7 *Clostridium difficile* is controlled by a plethora of diguanylate cyclases and  
8 phosphodiesterases. *PLoS Genet.* **7**, (2011).
- 9 22. Soutourina, O. a. *et al.* Genome-Wide Identification of Regulatory RNAs in the  
10 Human Pathogen *Clostridium difficile*. *PLoS Genet.* **9**, (2013).
- 11 23. Purcell, E. B. *et al.* A nutrient-regulated cyclic diguanylate phosphodiesterase controls  
12 *Clostridium difficile* biofilm and toxin production during stationary phase. *Infect.*  
13 *Immun.* IAI.00347-17 (2017) doi:10.1128/IAI.00347-17.
- 14 24. Sudarsan, N. *et al.* Riboswitches in eubacteria sense the second messenger cyclic di-  
15 GMP. *Science* **321**, 411–413 (2008).
- 16 25. Cairns, L. S., Hobley, L. & Stanley-Wall, N. R. Biofilm formation by *Bacillus subtilis*:  
17 New insights into regulatory strategies and assembly mechanisms. *Mol. Microbiol.* **93**,  
18 587–598 (2014).
- 19 26. Saujet, L., Monot, M., Dupuy, B., Soutourina, O. & Martin-Verstraete, I. The key  
20 sigma factor of transition phase, SigH, controls sporulation, metabolism, and virulence  
21 factor expression in *Clostridium difficile*. *J. Bacteriol.* **193**, 3186–3196 (2011).
- 22 27. Edwards, a. N., Nawrocki, K. L. & McBride, S. M. Conserved Oligopeptide  
23 Permeases Modulate Sporulation Initiation in *Clostridium difficile*. *Infect. Immun.*



- 1 (2014) doi:10.1128/IAI.02323-14.
- 2 28. Girinathan, B. P., Ou, J., Dupuy, B. & Govind, R. Pleiotropic roles of *Clostridium*  
3 *difficile* sin locus. *PLOS Pathog.* **14**, e1006940 (2018).
- 4 29. Cairns, L. S., Marlow, V. L., Bissett, E., Ostrowski, A. & Stanley-Wall, N. R. A  
5 mechanical signal transmitted by the flagellum controls signalling in *Bacillus subtilis*.  
6 *Mol. Microbiol.* **90**, 6–21 (2013).
- 7 30. Baban, S. T. *et al.* The role of flagella in *Clostridium difficile* pathogenesis:  
8 comparison between a non-epidemic and an epidemic strain. *PLoS One* **8**, (2013).
- 9 31. Emerson, J. E. *et al.* A novel genetic switch controls phase variable expression of  
10 CwpV, a *Clostridium difficile* cell wall protein. *Mol. Microbiol.* **74**, 541–556 (2009).
- 11 32. Goulding, D. *et al.* Distinctive profiles of infection and pathology in hamsters infected  
12 with *Clostridium difficile* strains 630 and B1. *Infect. Immun.* **77**, 5478–5485 (2009).
- 13 33. Bateman, A. *et al.* UniProt: The universal protein knowledgebase. *Nucleic Acids Res.*  
14 **45**, D158–D169 (2017).
- 15 34. Kalvari, I. *et al.* Rfam 13.0: shifting to a genome-centric resource for non-coding RNA  
16 families. *Nucleic Acids Res.* **46**, D335–D342 (2018).
- 17 35. Langdon, W. B., Petke, J. & Lorenz, R. Evolving better RNAfold structure prediction.  
18 *Lect. Notes Comput. Sci. (including Subser. Lect. Notes Artif. Intell. Lect. Notes*  
19 *Bioinformatics)* **10781 LNCS**, 220–236 (2018).
- 20 36. Kerpedjiev, P., Hammer, S. & Hofacker, I. L. Forna (force-directed RNA): Simple and  
21 effective online RNA secondary structure diagrams. *Bioinformatics* **31**, 3377–3379  
22 (2015).

- 1 37. Eggenhofer, F., Tafer, H., Stadler, P. F. & Hofacker, I. L. RNAPredator: fast  
2 accessibility-based prediction of sRNA targets. *Nucleic Acids Res.* **39**, W149–W154  
3 (2011).
- 4 38. Faulds-Pain, A. & Wren, B. W. Improved bacterial mutagenesis by high-frequency  
5 allele exchange, demonstrated in *Clostridium difficile* and *Streptococcus suis*. *Appl.*  
6 *Environ. Microbiol.* **79**, 4768–4771 (2013).
- 7 39. Fagan, R. P. & Fairweather, N. F. *Clostridium difficile* has two parallel and essential  
8 Sec secretion systems. *J. Biol. Chem.* **286**, 27483–27493 (2011).
- 9 40. Bloom-Ackermann, Z. *et al.* Toxin-Antitoxin systems eliminate defective cells and  
10 preserve symmetry in *Bacillus subtilis* biofilms. *Environ. Microbiol.* **18**, 5032–5047  
11 (2016).
- 12 41. Rothenbacher, F. P. *et al.* *Clostridium difficile* MazF toxin exhibits selective, not  
13 global, mRNA cleavage. *J. Bacteriol.* **194**, 3464–3474 (2012).
- 14 42. Maikova, A. *et al.* Discovery of new type I toxin-antitoxin systems adjacent to  
15 CRISPR arrays in *Clostridium difficile*. *Nucleic Acids Res.* **46**, 4733–4751 (2018).
- 16 43. Pizarro-Guajardo, M., Calderón-Romero, P. & Paredes-Sabja, D. Ultrastructure  
17 Variability of the Exosporium Layer of *Clostridium difficile* Spores from Sporulating  
18 Cultures and Biofilms. *Appl. Environ. Microbiol.* **82**, 5892 LP – 5898 (2016).
- 19 44. Pettit, L. J. *et al.* Functional genomics reveals that *Clostridium difficile* Spo0A  
20 coordinates sporulation, virulence and metabolism. *BMC Genomics* **15**, 160 (2014).
- 21 45. Dawson, L. F. *et al.* Characterisation of *Clostridium difficile* Biofilm Formation, a  
22 Role for Spo0A. *PLoS One* **7**, (2012).
- 23 46. Ireton, K., Gunther, N. W. & Grossman, A. D. spo0J is required for normal

- 1 chromosome segregation as well as the initiation of sporulation in *Bacillus subtilis*. *J.*  
2 *Bacteriol.* **176**, 5320 LP – 5329 (1994).
- 3 47. Quisel, J. D., Lin, D. C.-H. & Grossman, A. D. Control of Development by Altered  
4 Localization of a Transcription Factor in *B. subtilis*. *Mol. Cell* **4**, 665–672  
5 (1999).
- 6 48. Lawley, T. D. *et al.* Antibiotic treatment of *Clostridium difficile* carrier mice triggers a  
7 supershedder state, spore-mediated transmission, and severe disease in  
8 immunocompromised hosts. *Infect. Immun.* **77**, 3661–3669 (2009).
- 9 49. Buckley, A. M., Spencer, J., Candlish, D., Irvine, J. J. & Douce, G. R. Infection of  
10 hamsters with the UK *Clostridium difficile* ribotype 027 outbreak strain R20291. *J.*  
11 *Med. Microbiol.* **60**, 1174–1180 (2011).
- 12 50. Hofmann, J. D. *et al.* Metabolic Reprogramming of *Clostridioides difficile* During the  
13 Stationary Phase With the Induction of Toxin Production. *Front. Microbiol.* **9**, 1970  
14 (2018).
- 15 51. Lorenz, M. C. & Fink, G. R. Life and Death in a Macrophage: Role of the Glyoxylate  
16 Cycle in Virulence. *Eukaryot. Cell* **1**, 657 LP – 662 (2002).
- 17 52. Ahn, S., Jung, J., Jang, I. A., Madsen, E. L. & Park, W. Role of glyoxylate shunt in  
18 oxidative stress response. *J. Biol. Chem.* **291**, 11928–11938 (2016).
- 19 53. Weiss, M. C. *et al.* The physiology and habitat of the last universal common ancestor.  
20 *Nat. Microbiol.* **1**, 16116 (2016).
- 21 54. Babina, A. M., Lea, N. E. & Meyer, M. M. *In Vivo* Behavior of the Tandem Glycine  
22 Riboswitch in *Bacillus subtilis*. *MBio* **8**, e01602-17 (2017).
- 23 55. Mandal, M. *et al.* A Glycine-Dependent Riboswitch That Uses Cooperative Binding to

- 1 Control Gene Expression. *Science (80-. )*. **306**, 275 LP – 279 (2004).
- 2 56. Torgerson, C. D., Hiller, D. A., Stav, S. & Strobel, S. A. Gene regulation by a glycine  
3 riboswitch singlet uses a finely tuned energetic landscape for helical switching. *RNA*  
4 **24**, 1813–1827 (2018).
- 5 57. Khani, A., Popp, N., Kreikemeyer, B. & Patenge, N. A Glycine Riboswitch in  
6 *Streptococcus pyogenes* Controls Expression of a Sodium:Alanine Symporter Family  
7 Protein Gene . *Frontiers in Microbiology* vol. 9 200 (2018).
- 8 58. Neumann-Schaal, M., Hofmann, J. D., Will, S. E. & Schomburg, D. Time-resolved  
9 amino acid uptake of *Clostridium difficile* 630 $\Delta$ erm and concomitant fermentation  
10 product and toxin formation. *BMC Microbiol.* **15**, 281 (2015).
- 11 59. Fagan, R. P. *et al.* A proposed nomenclature for cell wall proteins of *Clostridium*  
12 *difficile*. *J. Med. Microbiol.* **60**, 1225–1228 (2011).
- 13 60. Biazzo, M. *et al.* Diversity of *cwp* loci in clinical isolates of *Clostridium difficile*. *J.*  
14 *Med. Microbiol.* **62**, 1444–1452 (2013).
- 15 61. Kirk, J. A. *et al.* New class of precision antimicrobials redefines role of *Clostridium*  
16 *difficile* S-layer in virulence and viability. *Sci. Transl. Med.* **9**, eaah6813 (2017).
- 17 62. Bordeleau, E., Purcell, E. B., Lafontaine, D. a, Fortier, L. & Tamayo, R. Cyclic di-  
18 GMP riboswitch-regulated type IV pili contribute to aggregation of *Clostridium*  
19 *difficile*. **197**, 819–832 (2015).
- 20 63. Purcell, E. B., McKee, R. W., McBride, S. M., Waters, C. M. & Tamayo, R. Cyclic  
21 diguanylate inversely regulates motility and aggregation in *Clostridium difficile*. *J.*  
22 *Bacteriol.* **194**, 3307–3316 (2012).
- 23 64. Chen, Y., Gozzi, K., Yan, F. & Chai, Y. Acetic Acid Acts as a Volatile Signal To

- 1 Stimulate Bacterial Biofilm Formation. *MBio* **6**, e00392-15 (2015).
- 2 65. Allan, R. N. *et al.* Pronounced Metabolic Changes in Adaptation to Biofilm Growth by  
3 *Streptococcus pneumoniae*. *PLoS One* **9**, e107015 (2014).
- 4 66. Pisithkul, T. *et al.* Metabolic Remodeling during Biofilm Development of &lt;span  
5 class=&quot;named-content genus-species&quot; id=&quot;named-content-  
6 1&quot;&gt;Bacillus subtilis&lt;/span&gt; *MBio* **10**, e00623-19 (2019).
- 7 67. Leiman, S. A., Arboleda, L. C., Spina, J. S. & McLoon, A. L. SinR is a mutational  
8 target for fine-tuning biofilm formation in laboratory-evolved strains of *Bacillus*  
9 *subtilis*. *BMC Microbiol.* **14**, 301 (2014).
- 10 68. Soutourina, O. RNA-based control mechanisms of *Clostridium difficile*. *Curr. Opin.*  
11 *Microbiol.* **36**, 62–68 (2017).
- 12 69. Weinberg, Z. *et al.* Detection of 224 candidate structured RNAs by comparative  
13 analysis of specific subsets of intergenic regions. *Nucleic Acids Res.* **45**, 10811–10823  
14 (2017).
- 15

1 FIGURE LEGENDS

2 **Figure 1. Characterisation of the immature (12 hr – A/B/C) and mature (3 day – E/F/G)**

3 ***C. difficile* biofilm.** (A/E) *C. difficile* biofilm is composed of viable vegetative (blue bar) and  
4 spores cells (green bar) (mean  $\pm$ SEM), forms 3D structures [false-coloured scanning electron  
5 micrograph at x200 (B/F) and x10,000 (C/G)], (C/G) where cells are enclosed in a self-  
6 produced matrix (greens arrows) and cellular debris (red arrows).

7 **Figure 2. Characterising the role of SinR towards biofilm formation.** Expression profiles

8 of *sinR* (CDR20291\_2121) and *sinR'* (CDR20291\_2122) from RNA-Seq data (A) and  
9 independent RT-PCR reactions (B) (similar to **Figure 4**). Biofilm formation (C), as measured  
10 by crystal violet absorption, for *sinR* mutant ( $\Delta$ 2121 – blue bar) in either wild-type  
11 background (WT – blue bar) or a flagella glycosylation mutant background (0241::Tn – blue  
12 bars). *sinR* plasmid complemented (pRPF144-CDR20291\_2121) in these background strains  
13 (red bars). \*\*\* indicates  $p < 0.001$ . False-coloured scanning electron microscopy images of  
14 biofilms from *sinR* mutant and *sinR*/flagella glycosylation double mutant strains (D).

15 **Figure 3. Dominant metabolic pathways and cell surface changes during biofilm**

16 **formation.** A model for amino acid uptake and metabolism of glycine, and cell surface  
17 organelle modifications during biofilm formation compared with stationary phase cells.  
18 Protein names/numbers are coloured green or red based on gene expression, up or down-  
19 regulated respectively, of biofilm cells compared with stationary phase cells. Protein  
20 names/numbers have been shortened (from CDR20291\_\*) for simplicity. THF –  
21 Tetrahydrofolate, CoA – co-enzyme A, c-di-GMP – cyclic diguanylate.

22 **Figure 4. Expression and predicted structure of two glycine riboswitches.** Expression and

23 structure of glycine riboswitches CDR20291\_CDs019 (A, C, E) and CDR20291\_CDs028 (B,  
24 D, F). Expression patterns for each glycine riboswitch from RNA-Seq data (pictures are

- 1 representative expression profiles from a single sequencing replicate), including the
- 2 downstream gene expression (A, B) and RT-PCR for each sRNA (PCR picture shown is from
- 3 independent RNA extractions to those used for RNA-Seq; replicate number is shown on the
- 4 picture) with a genomic(g) DNA control (C, D). Predicted secondary structures of each
- 5 riboswitch (using RNAfold software).



1 Figure 1

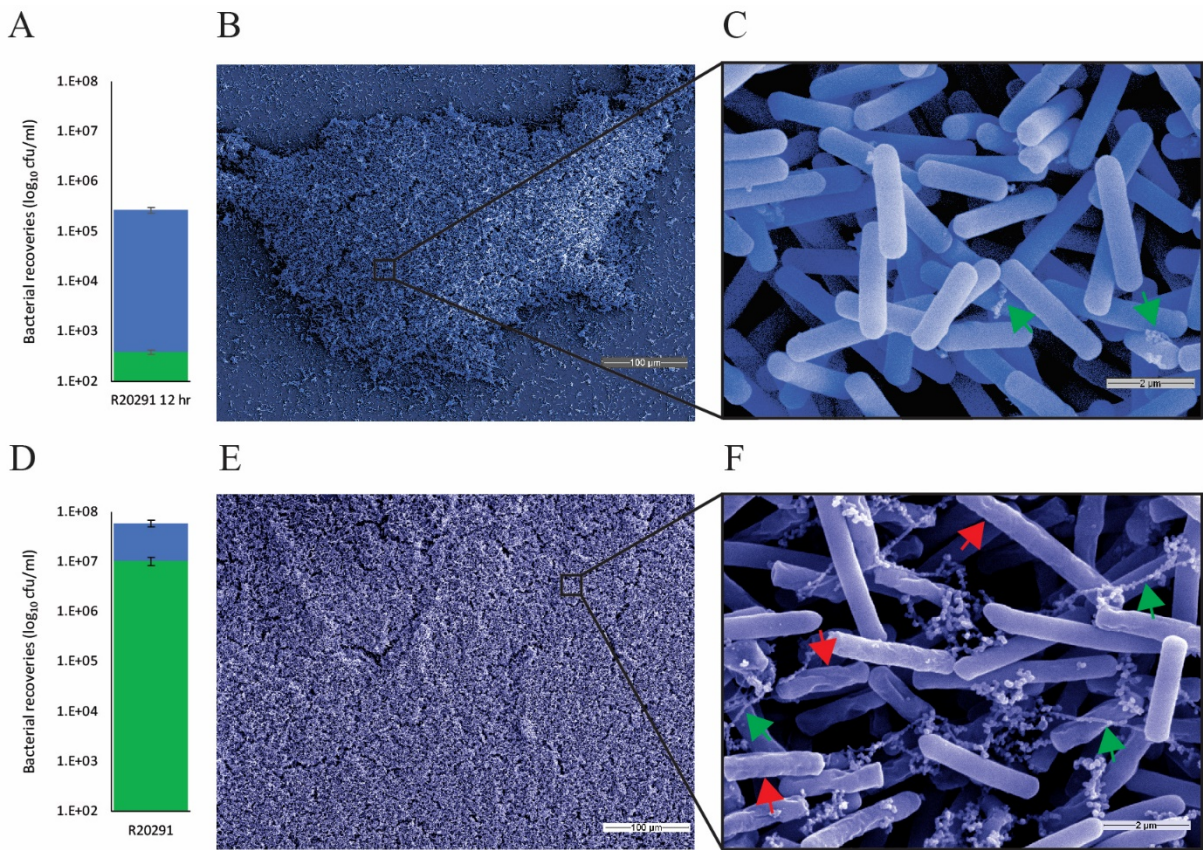

2

3



1 Figure 2

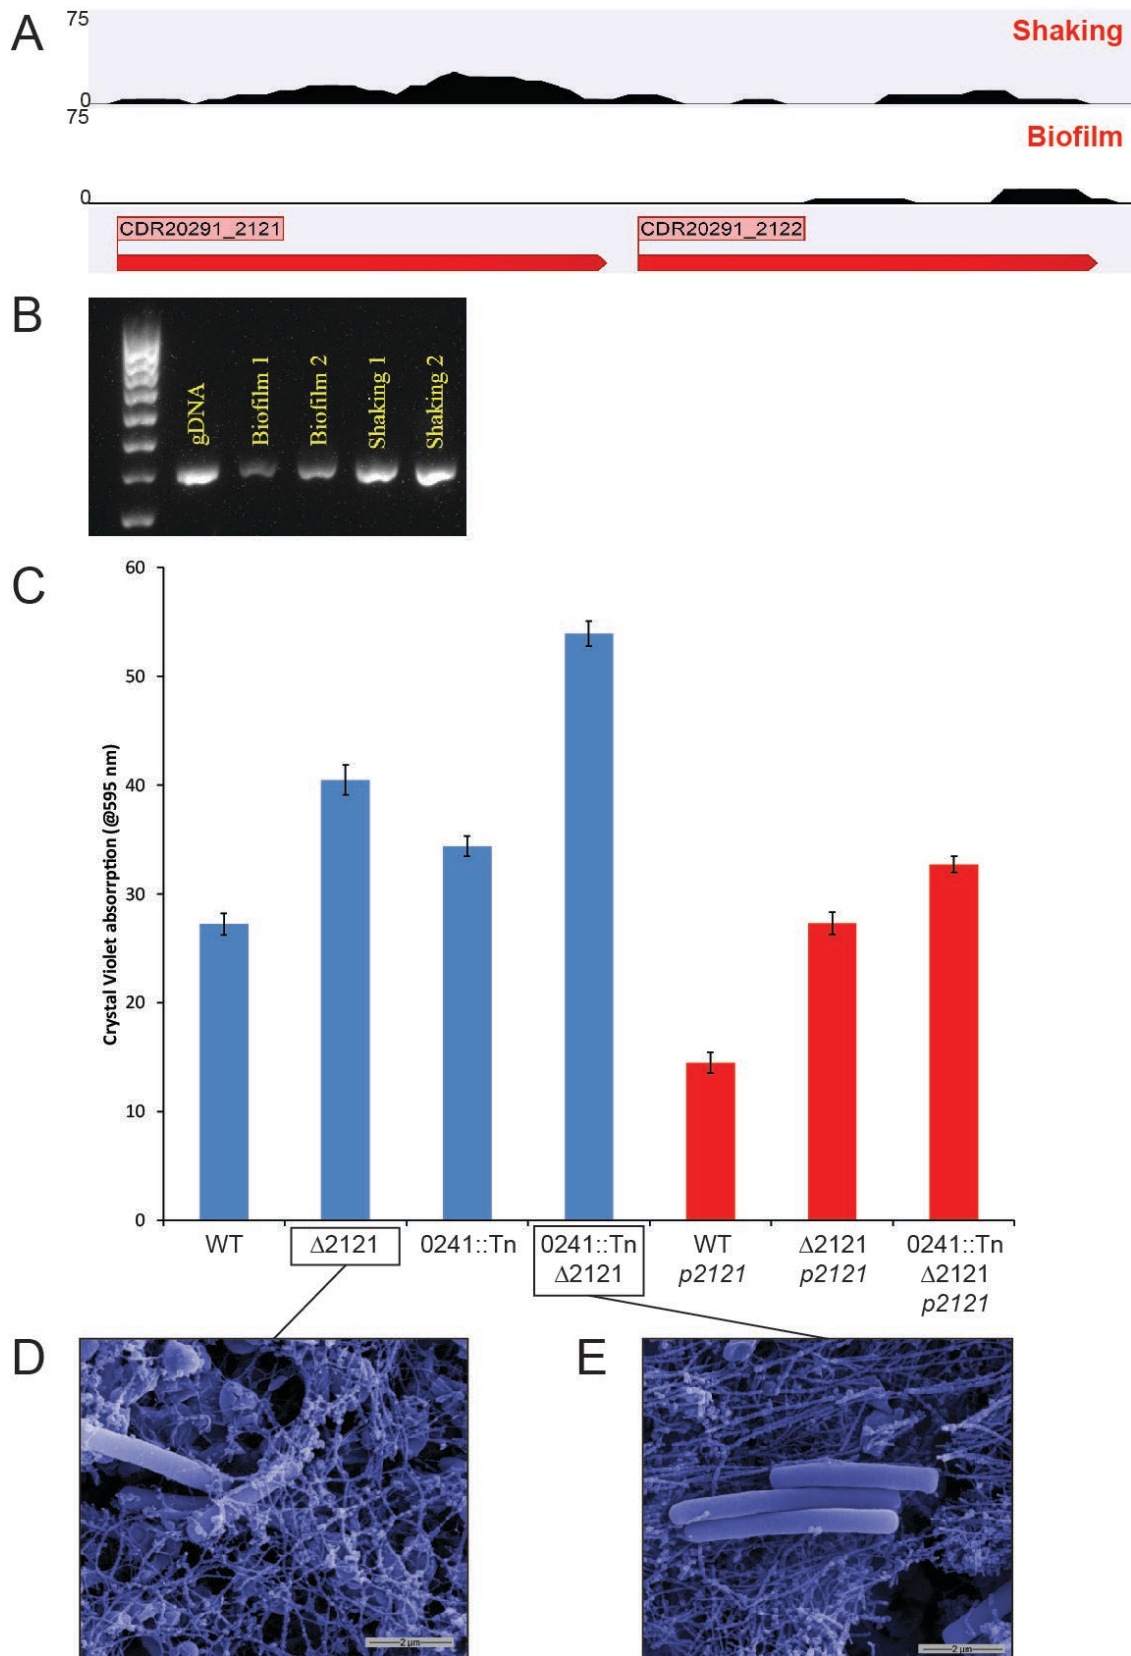

1 Figure 3

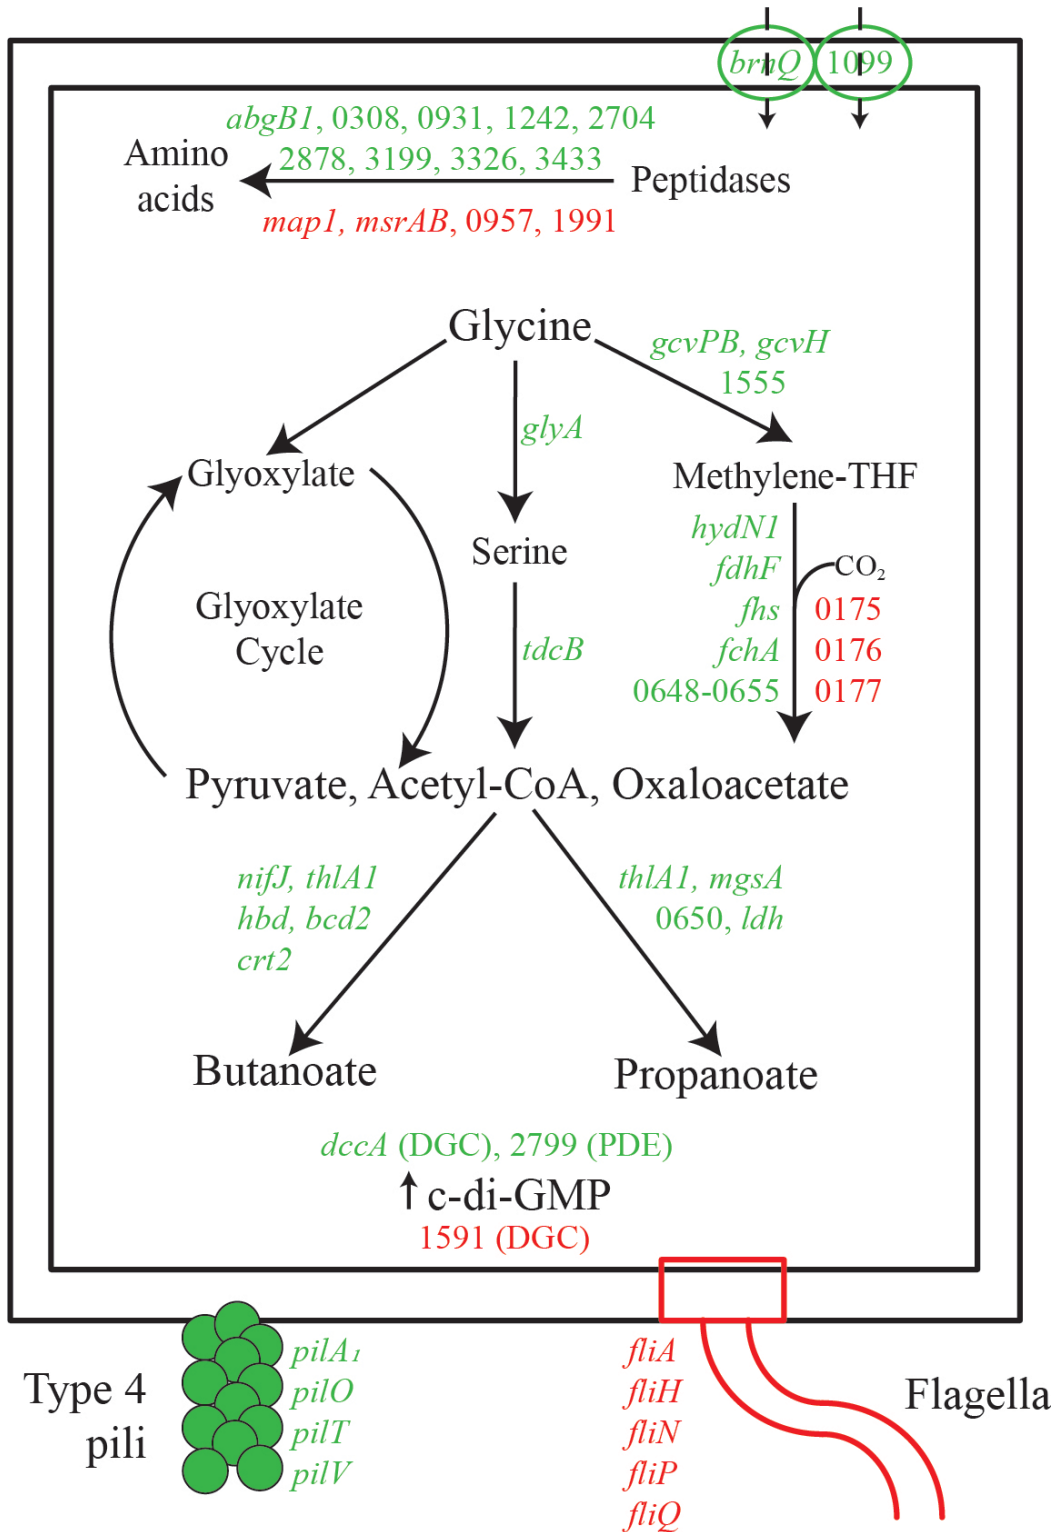

2

3

1 Figure 4

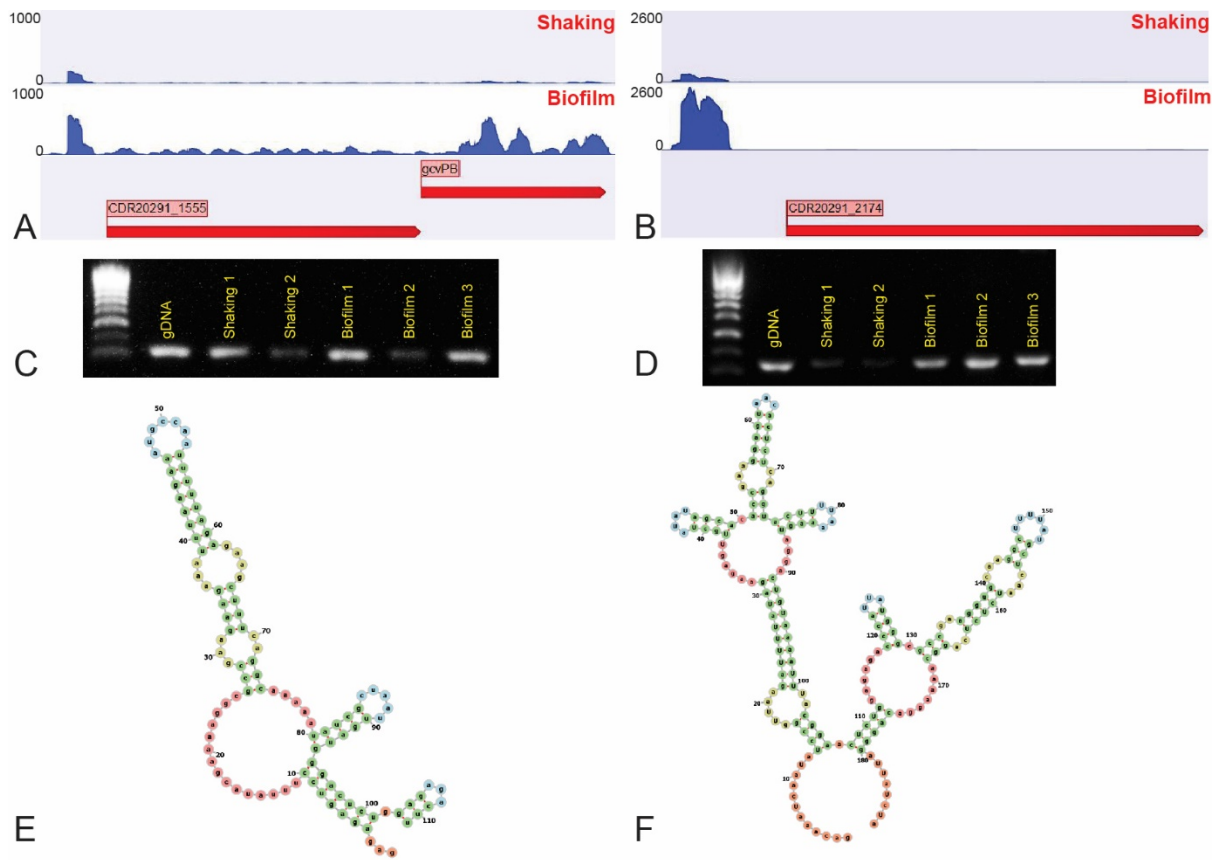

2

3

## 1 Table 2

Table 2 c-di-GMP riboswitches in *C. difficile* R20291

| Name <sup>A</sup> | Strand | 5' start | 3' end  | Size (bp) | Flanking genes              |
|-------------------|--------|----------|---------|-----------|-----------------------------|
| Cdi1_3            | +      | 308009   | 308223  | 212       | CDR20291_0247 & <i>flgB</i> |
| Cdi1_9            | +      | 2582664  | 2582815 | 152       | CDR20291_2197 & <i>cspD</i> |
| Cdi1_12           | -      | 3217190  | 3216981 | 210       | CDR20291_2721 & 2722        |
| Cdi2_3            | -      | 3220424  | 3220558 | 135       | CDR20291_2722 & 2723        |
| Cdi2_4            | -      | 3986713  | 3986601 | 239       | CDR20291_3550 & <i>prs</i>  |

<sup>A</sup> RNA names from *C. difficile* strain 630 data (Soutourina, 2013).

## 2
